# Supplementary material for: The dissociating effects of fear and disgust on multisensory integration in autism: evidence from evoked potentials
Source: Front Neurosci. 2024 Aug 5;18:1390696. doi: 10.3389/fnins.2024.1390696 (PMC11330835; doi:10.3389/fnins.2024.1390696)
Supplement: Supplementary file 1 [file Table_1.DOCX]

**Supplementary Table 1.** Statistical results of behavioural responses’ comparisons for median reaction times (RT), the standard deviation of reactiontimes (SDRT) and accuracy for the two mixed model ANOVAs (see Methods). Auditory vs AV_A indicates the contrast between the auditory and audiovisual condition degraded with auditory noise and the Visual vs AV_V the contrast between visual and audiovisual condition degraded with visual noise.

|  | | **Mixed model ANOVA table** | | | | | | | | | | | | | | |
| --- | --- | --- | --- | --- | --- | --- | --- | --- | --- | --- | --- | --- | --- | --- | --- | --- |
| **Median RT (ms)** | | | | **SDRT (ms)** | | | | | **Accuracy (%)** | | | | | |
| **Auditory vs AV_A** | | **F(df)** | ***p*** | **ηp2** | | **F(df)** | ***p*** | **ηp2** | | | **F(df)** | | | ***p*** | | **ηp2** |
|  | Group | F(1,38 ) = 0.11 | .740 | .003 | | F(1,38 ) = 0.51 | .480 | .013 | | | F(1,38 ) = 1.19 | | | .283 | | .030 |
|  | Condition | F(1,38 ) = 90.03 | **<.001** | .703 | | F(1,38) = 56.43 | **<.001** | .598 | | | F(1,38) = 60.06 | | | **<.001** | | .612 |
|  | Group x Condition | F(1,38 ) = 1.99 | .166 | .050 | | F(1,38 ) = 0.16 | .689 | .004 | | | F(1,38 ) = 0.29 | | | .593 | | .008 |
|  | Emotion | F(1,38 ) = 7.97 | **.008** | .173 | | F(1,38 ) = 0.06 | .814 | .001 | | | F(1,38 ) = 0.01 | | | .941 | | 0 |
|  | Emotion x Condition | F(1,38 ) = 6.5 | **.015** | .146 | | F(1,38 ) = 1.47 | .232 | .037 | | | F(1,38 ) = 4.87 | | | **.033** | | .114 |
|  | Group x Emotion | F(1,38 ) = 0.15 | .704 | .004 | | F(1,38 ) = 0.31 | .583 | | .008 | | | F(1,38 ) = 0 | | .991 | | 0 |
|  | Group x Emotion x Condition | F(1,38 ) = .22 | .642 | .006 | | F(1,38 ) = 0.002 | .961 | | 0 | | | F(1,38 ) = 0.002 | | .966 | | 0 |
|  | |  | | | | | | | | | | | | | | |
| **Visual vs AV_V** | |  | | | | | | | | | | | | | | |
|  | Group | F(1,38 ) = 0.90 | .348 | | .023 | F(1,38 ) = 0.401 | .530 | | | 0.010 | | | F(1,38 ) = 1.28 | | .265 | .033 |
|  | Condition | F(1,38 ) = 31.51 | **<.001** | | .618 | F(1,38) = 9.78 | **.003** | | | .205 | | | F(1,38) = 34.87 | | **<.001** | .478 |
|  | Group x Condition | F(1,38 ) = 0.01 | .926 | | 0 | F(1,38 ) = 0.1 | .750 | | | 0.03 | | | F(1,38 ) = 0.99 | | .325 | .025 |
|  | Emotion | F(1,38 ) = 27.96 | **<.001** | | .424 | F(1,38 ) = 1.07 | .308 | | | .027 | | | F(1,38 ) = 7.29 | | **.010** | .161 |
|  | Emotion x Condition | F(1,38 ) = 8.39 | **.006** | | .181 | F(1,38 ) = 0.307 | .583 | | | .008 | | | F(1,38 ) = 6.462 | | **.015** | .145 |
|  | Group x Emotion | F(1,38 ) = 2.60 | .115 | | .064 | F(1,38 ) = 0.77 | .386 | | | .020 | | | F(1,38 ) = 0.270 | | .606 | .007 |
|  | Group x Emotion x Condition | F(1,38 ) = .01 | .947 | | 0 | F(1,38 ) = 0.81 | .373 | | | .021 | | | F(1,38 ) = 0.78 | | .383 | .020 |
